# Supplementary material for: Amino-acid-substituted polyacetylene-based chiral core–shell microspheres: helix structure induction and application for chiral resolution and adsorption
Source: Royal Society of Chemistry journal article supplement (doi:10.1039/d1py01067k), 2021-01-01
Supplement: d1py01067k1.pdf [file d1py01067k1.pdf]

Supporting Information

**Amino Acid Substituted Polyacetylene Based Chiral  
Core-Shell Microspheres: Helical Structure Induction  
and Application for Chiral Resolution and  
Adsorption**

Lijie Yin<sup>a</sup>, Huimin Duan<sup>a</sup>, Tao Chen<sup>a</sup>, Dongming Qi<sup>a,\*</sup>, Jianping Deng<sup>b</sup>

<sup>a</sup> *State Key Laboratory of Advanced Textile Materials and Manufacturing Technology,  
Ministry of Education of the People's Republic of China, School of Materials Science  
and Engineering & School of Textile Science and Engineering, Zhejiang Sci-Tech  
University, Hangzhou 310018, China*

<sup>b</sup> *State Key Laboratory of Chemical Resource Engineering, College of Materials  
Science and Engineering, Beijing University of Chemical Technology, Beijing 100029,  
China*

About enantioselective crystallization: The prepared chiral composite microspheres are put into a simple separation column, which contains a hollow small test tube. There is a filter film at the bottom of the small test tube, and the bottom was sealed with a plastic film. Remove the preservative film and centrifuge after crystallization was completed. The crystals and microspheres remained in the small test tube, and the supernatant flows into the outer test tube. Chiral adsorption: put the prepared chiral microspheres into the filter paper, and then the steps are the same as above.

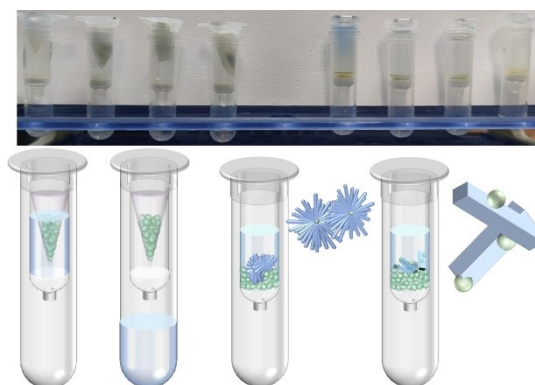

**Fig. S1.** Enantioselective crystallization and adsorption

A series of parallel experiments with different monomer concentrations of DVB-55 were carried out to obtain microspheres with uniform particle size and good morphology, as follows, anhydrous acetonitrile (29.4 mL, 29.2 mL, 28.9 mL, 28.8 mL, 28.6 mL), DVB-55 (0.6 mL, 0.8 mL, 1.1 mL, 1.2 mL, 1.4 mL; 2.0 vol.%, 2.7 vol.%, 3.6 vol.%, 4.0 vol.%, 4.6 vol.% relative to total volume), AIBN (12 mg, 16 mg, 22 mg, 24 mg, 28 mg, 2.0 wt.% relative to DVB55).

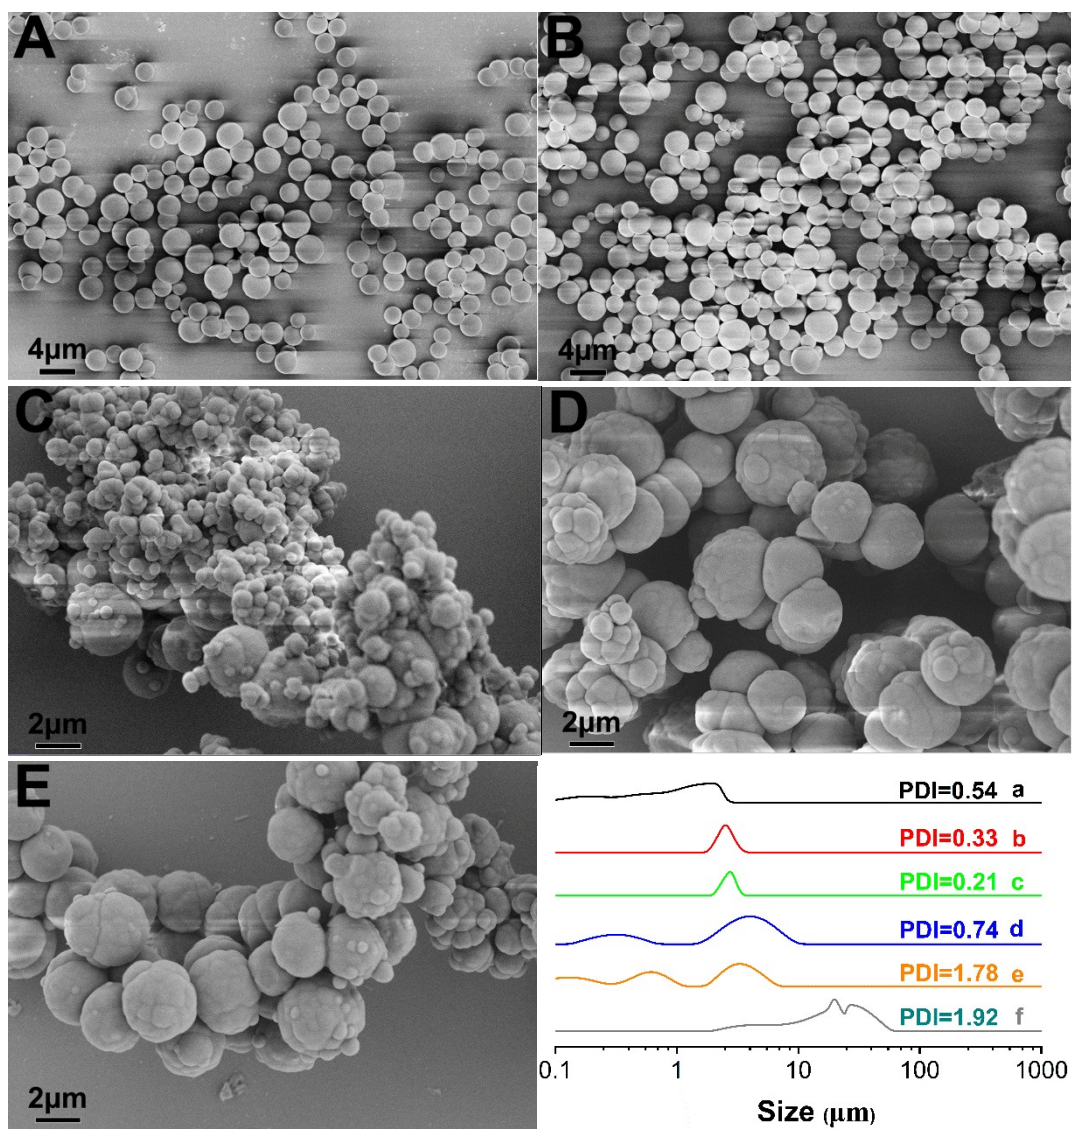

**Fig. S2.** The SEM and particle size distributions for PDVB microspheres with different volume fractions of DVB-55; 2 vol.% (A); 2.7 vol.% (B); 3.6 vol.% (C); 4.0 vol.% (D); 4.6 vol.% (E) and 2 vol.% (a); 2.7 vol.% (b); 3.3 vol.% (c); 3.6 vol.% (d); 4 vol.% (e); 4.6 vol.% (f)

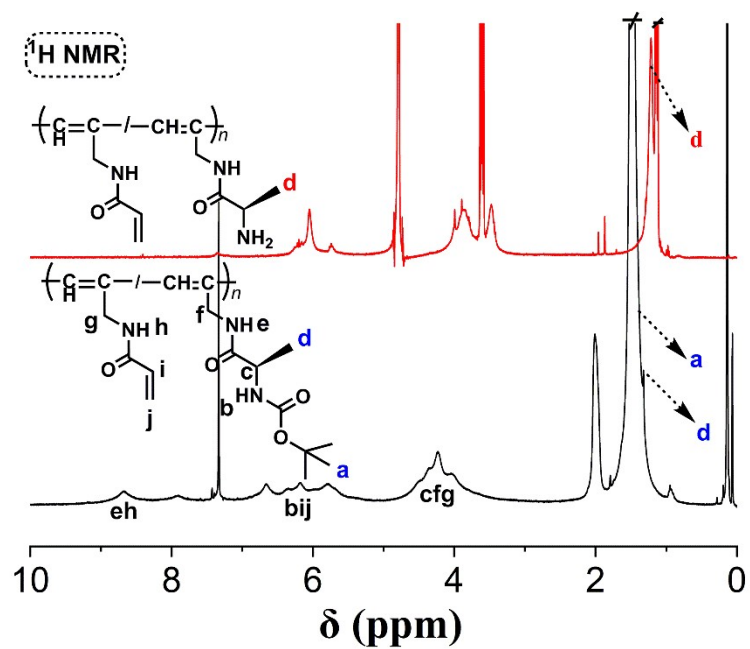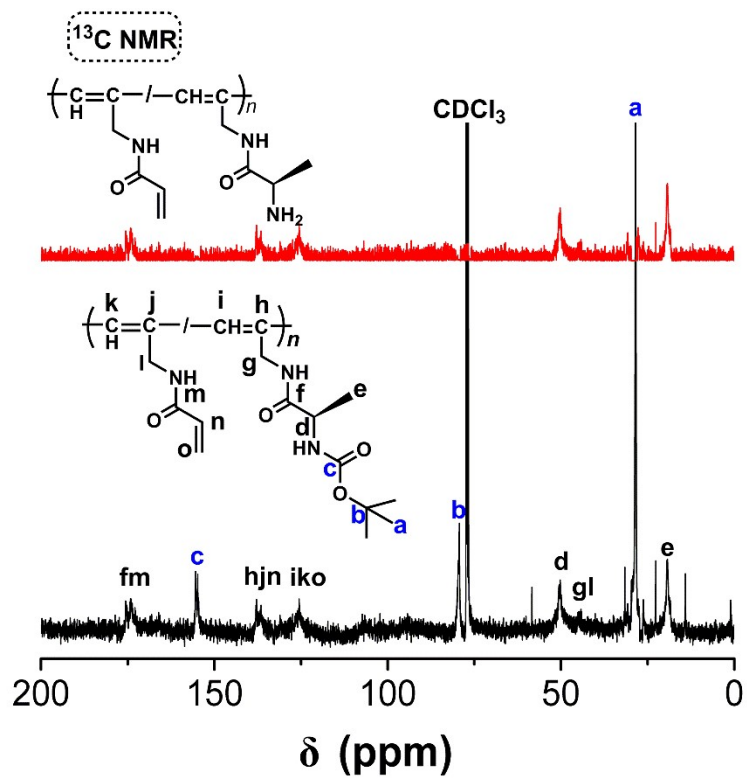

**Fig. S3.** A comparison between the NMR spectra of P-M1-*co*-M2-Boc and P-M1-*co*-M2-NH<sub>2</sub>

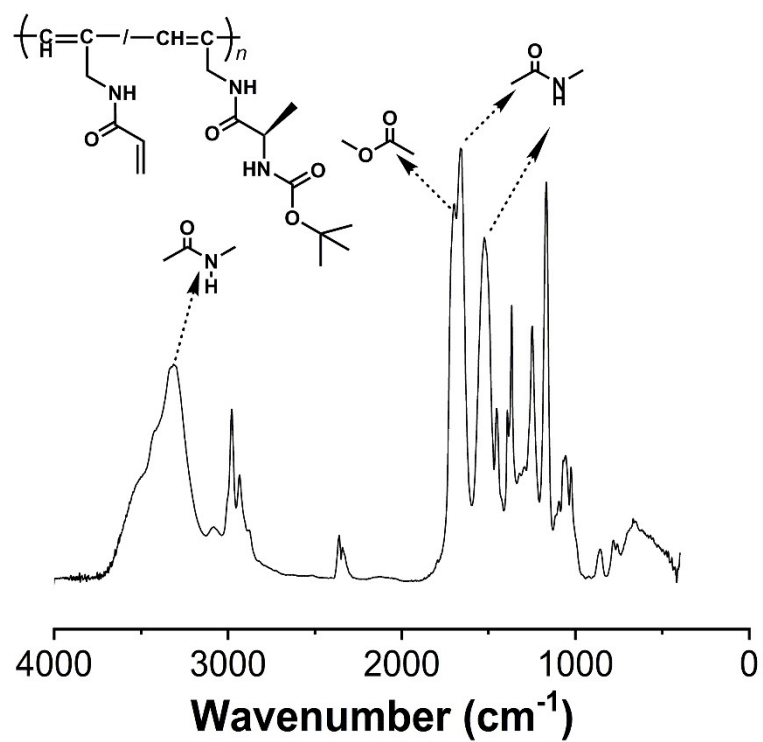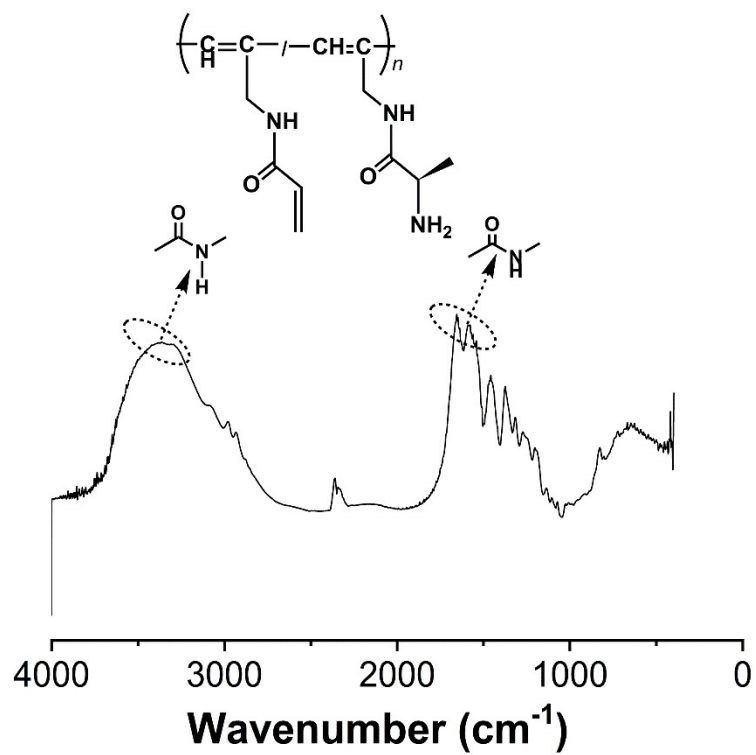

**Fig. S4.** A comparison between the FT-IR spectra of P-M1-*co*-M2-Boc and P-M1-*co*-M2-NH<sub>2</sub>

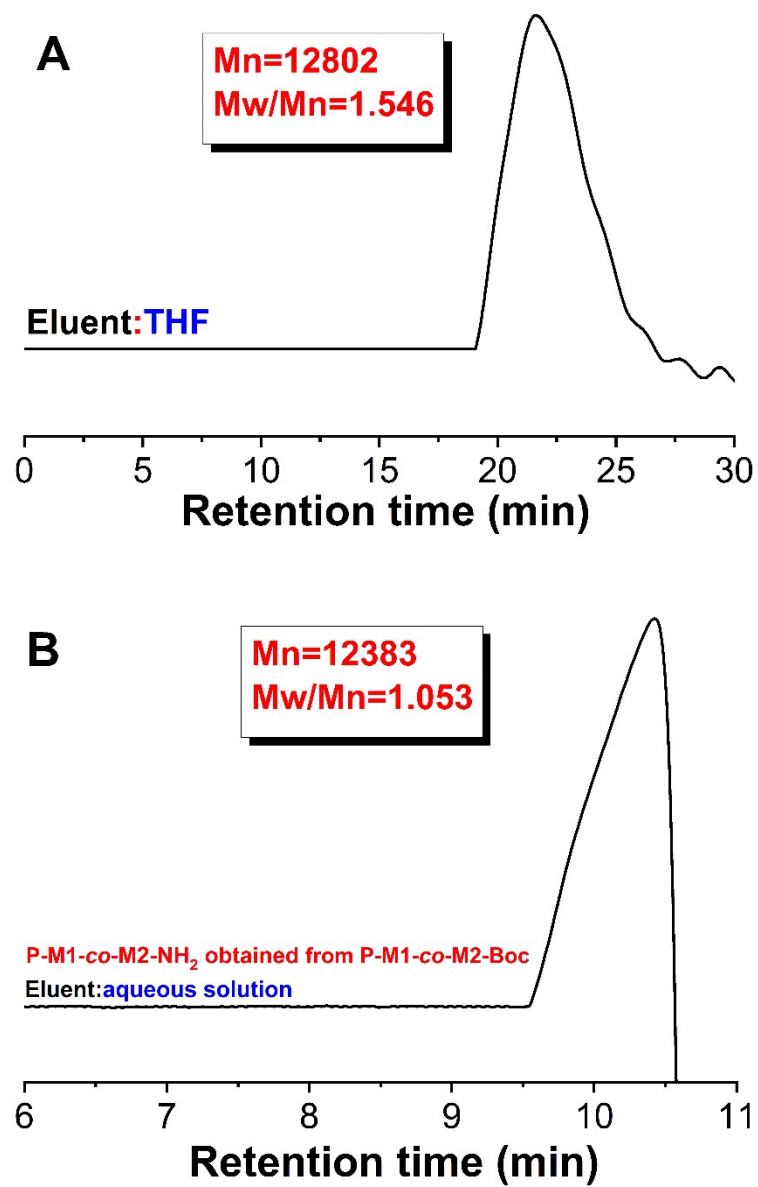

**Fig. S5.** The GPC curves of P-M1-co-M2-Boc (A) and P-M1-co-M2-NH<sub>2</sub> obtained from P-M1-co-M2-Boc (B)

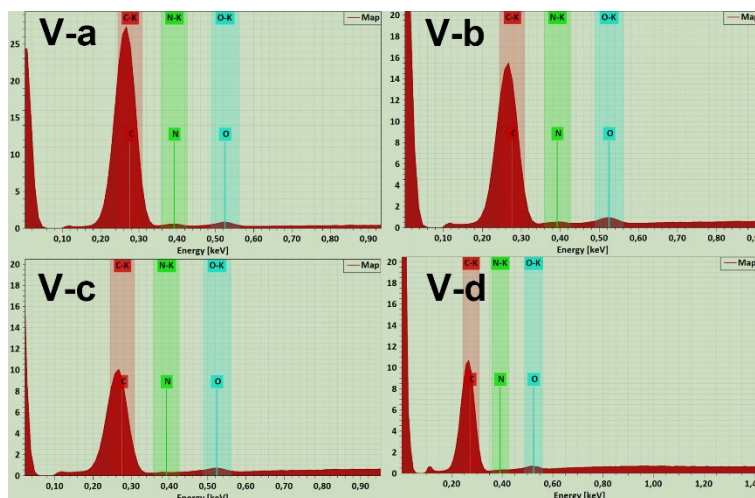

Figure S6. The SEM-EDS of V-(a-d)

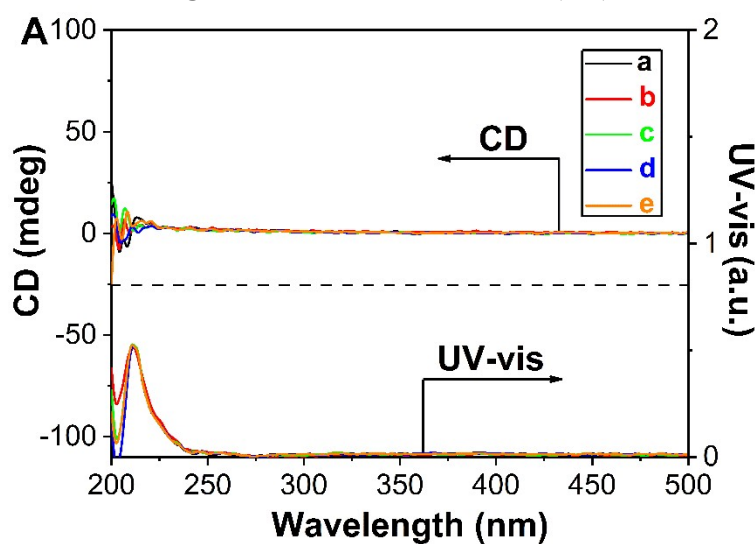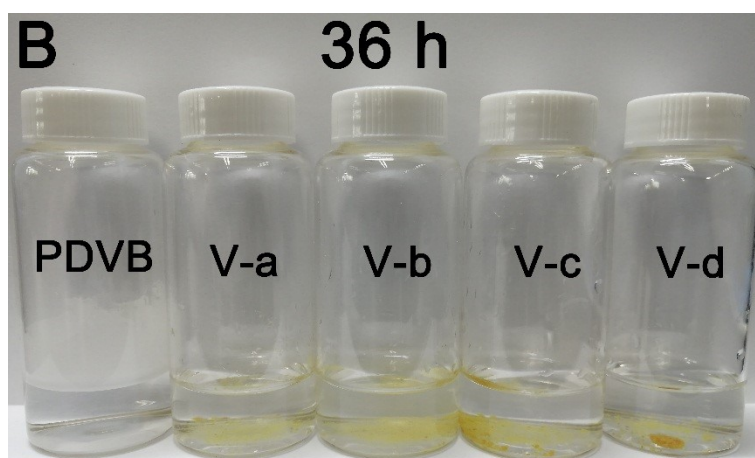

Fig. S7. A, CD and UV-vis spectroscopy of the residual solution of enantioselective crystallization: PDVB (a); V-a (b); V-b (c); V-c (d); V-d (e)

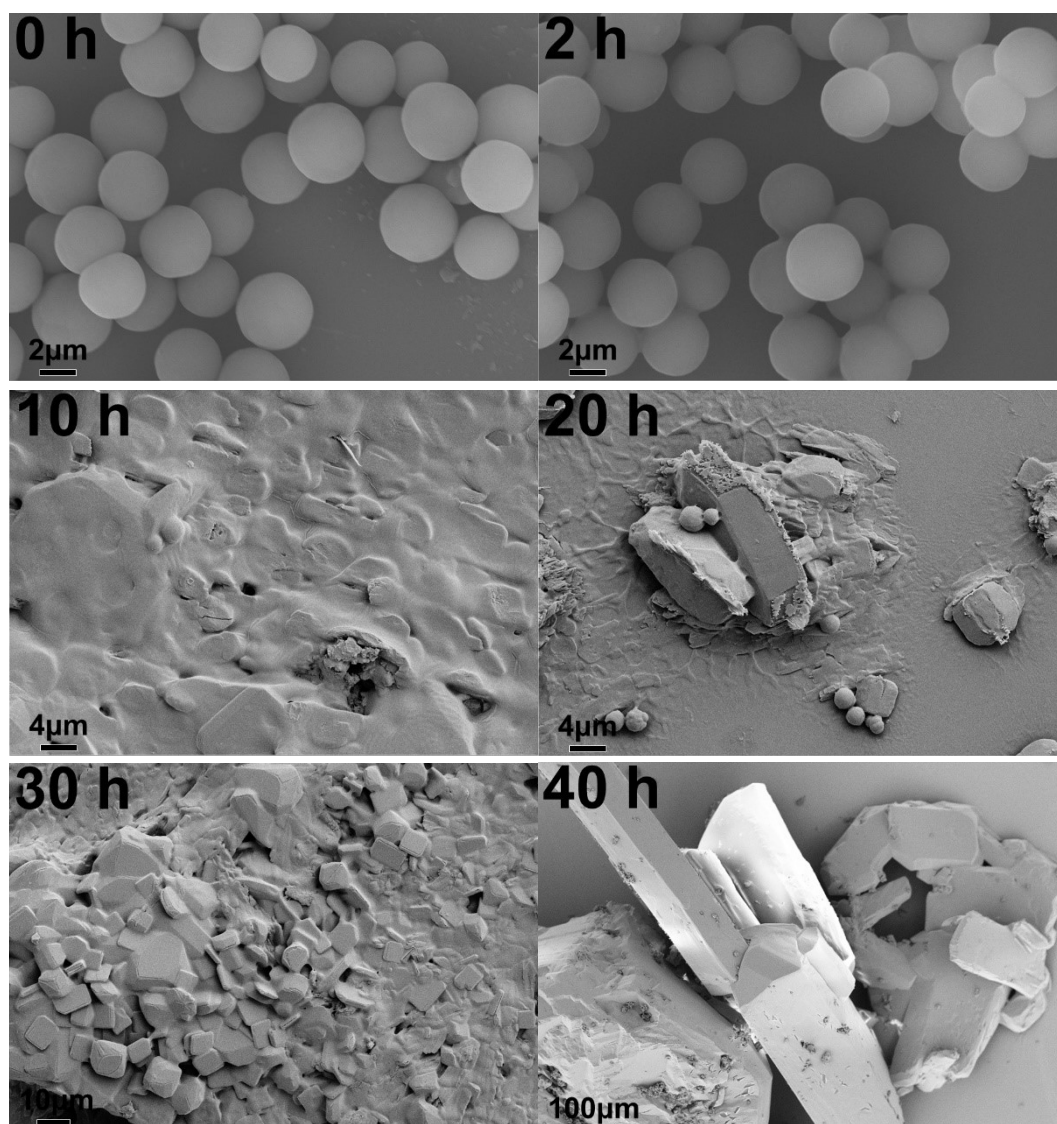

**Fig. S8.** SEM images of Boc-L-alanine crystals growing induced by (L)-chiral core-shell microspheres.



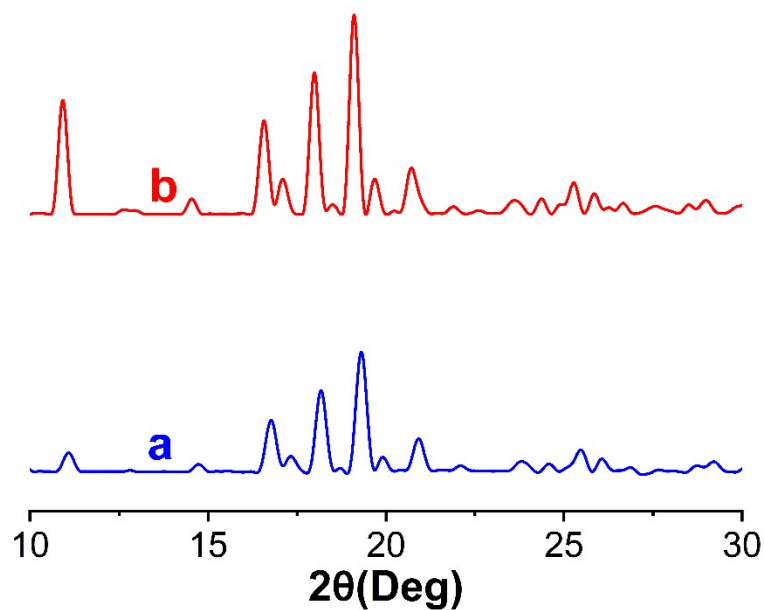

**Fig. S9.** X-ray diffraction patterns of (a) pure Boc-L-alanine crystals and (b) Boc-L-alanine crystals were induced by (L)-chiral composite microspheres

**Table S1.** The optical rotation of amino acid in excess in the residual solution

| Run                                                    | Optical rotation     |         |                     |         |         |               |         |               |  |
|--------------------------------------------------------|----------------------|---------|---------------------|---------|---------|---------------|---------|---------------|--|
|                                                        | Boc-D-Ala (15 mg/ml) |         | Boc-D-Asn (5 mg/ml) |         |         | Met (5 mg/ml) |         | Pro (5 mg/ml) |  |
| Pure amino acid                                        | 0.3692               |         | -0.0671             |         |         | 0.0394        |         | 0.4745        |  |
| Time (h)                                               | 5                    | 10      | 15                  | 20      | 30      | 40            | 50      | 60            |  |
| the Boc-Ala in excess in the residual solution (L-V-a) | 0.0332               | 0.0478  | 0.0627              | 0.0812  | 0.1255  | 0.2215        | 0.3138  | 0.3507        |  |
| the Boc-Ala in excess in the residual solution (L-V-b) | 0.0443               | 0.0664  | 0.1107              | 0.1476  | 0.2621  | 0.328         | 0.3510  | 0.3510        |  |
| the Boc-Ala in excess in the residual solution (L-V-c) | 0.0485               | 0.0728  | 0.0956              | 0.1661  | 0.2879  | 0.3322        | 0.3508  | 0.3508        |  |
| the Boc-Asn in excess in the residual solution (L-V-c) | -0.0060              | -0.0080 | -0.0150             | -0.0190 | -0.0312 | -0.0435       | -0.0577 | -0.0600       |  |
| the Met in excess in the residual solution (L-V-c)     | 0.0035               | 0.0055  | 0.0078              | 0.0102  | 0.0157  | 0.0216        | 0.0263  | 0.0307        |  |

|                                                                    |        |        |        |        |        |        |        |        |
|--------------------------------------------------------------------|--------|--------|--------|--------|--------|--------|--------|--------|
| the Pro in<br>excess in the<br>residual solution<br><b>(L-V-c)</b> | 0.0379 | 0.0616 | 0.0901 | 0.1328 | 0.1945 | 0.3084 | 0.3368 | 0.3796 |
|--------------------------------------------------------------------|--------|--------|--------|--------|--------|--------|--------|--------|
